# Supplementary material
Source: publisher figshare collection journal article supplement (https://acs.figshare.com/ndownloader/files/4778341)
Supplement: Supplementary file 1 [file 4778341]

 
data_ft01
 
_audit_creation_method            SHELXL-97
_chemical_name_systematic
;
 ?
;
_chemical_name_common             ?
_chemical_melting_point           ?
_chemical_formula_moiety          ?
_chemical_formula_sum
 'C48 H50 O P2 Pt'
_chemical_formula_weight          899.91
 
loop_
 _atom_type_symbol
 _atom_type_description
 _atom_type_scat_dispersion_real
 _atom_type_scat_dispersion_imag
 _atom_type_scat_source
 'C'  'C'   0.0033   0.0016
 'International Tables Vol C Tables 4.2.6.8 and 6.1.1.4'
 'H'  'H'   0.0000   0.0000
 'International Tables Vol C Tables 4.2.6.8 and 6.1.1.4'
 'O'  'O'   0.0106   0.0060
 'International Tables Vol C Tables 4.2.6.8 and 6.1.1.4'
 'P'  'P'   0.1023   0.0942
 'International Tables Vol C Tables 4.2.6.8 and 6.1.1.4'
 'Pt'  'Pt'  -1.7033   8.3905
 'International Tables Vol C Tables 4.2.6.8 and 6.1.1.4'
 
_symmetry_cell_setting          Monoclinic 
_symmetry_space_group_name_H-M    P2(1)/n 
 
loop_
 _symmetry_equiv_pos_as_xyz
 'x, y, z'
 '-x+1/2, y+1/2, -z+1/2'
 '-x, -y, -z'
 'x-1/2, -y-1/2, z-1/2'
 
_cell_length_a                    18.5273(7)
_cell_length_b                    10.3442(5)
_cell_length_c                    21.1903(10)
_cell_angle_alpha                 90.00
_cell_angle_beta                  105.931(4)
_cell_angle_gamma                 90.00
_cell_volume                      3905.1(3)
_cell_formula_units_Z             4
_cell_measurement_temperature     100(2)
_cell_measurement_reflns_used     ?
_cell_measurement_theta_min       3.0111
_cell_measurement_theta_max       30.2738
 
_exptl_crystal_description        plate 
_exptl_crystal_colour                             white 
_exptl_crystal_size_max                           0.10187
_exptl_crystal_size_mid                           0.07287
_exptl_crystal_size_min                           0.02287
_exptl_crystal_density_meas       ? 
_exptl_crystal_density_diffrn     1.531
_exptl_crystal_density_method     'not measured'
_exptl_crystal_F_000              1816
_exptl_absorpt_coefficient_mu     3.712
_exptl_absorpt_correction_T_min                   0.49132
_exptl_absorpt_correction_T_max                   0.75351
_exptl_absorpt_correction_type            'analytical'
_exptl_absorpt_process_details
;
CrysAlis RED, Oxford Diffraction Ltd.,
Version 1.171.29.2 (release 20-01-2006 CrysAlis171 .NET)
(compiled Jan 20 2006,12:36:28)
Analytical numeric absorption correction using a multifaceted crystal
  model based on expressions derived by R.C. Clark & J.S. Reid.
(Clark, R. C. & Reid, J. S. (1995). Acta Cryst. A51, 887-897)
;
  
_exptl_special_details
;
 ?
;
  
_diffrn_ambient_temperature       100(2)
_diffrn_radiation_wavelength      0.71073
_diffrn_radiation_type            MoK\a
_diffrn_radiation_source          'fine-focus sealed tube'
_diffrn_radiation_monochromator   graphite
_diffrn_measurement_device_type   'Oxford Diffraction CCD'
_diffrn_measurement_method        '\w/\f scans'
_diffrn_detector_area_resol_mean  ?
_diffrn_standards_number          ?
_diffrn_standards_interval_count  ?
_diffrn_standards_interval_time   ?
_diffrn_standards_decay_%         ?
_diffrn_reflns_number             67777
_diffrn_reflns_av_R_equivalents   0.0282
_diffrn_reflns_av_sigmaI/netI     0.0241
_diffrn_reflns_limit_h_min        -25
_diffrn_reflns_limit_h_max        25
_diffrn_reflns_limit_k_min        -13
_diffrn_reflns_limit_k_max        14
_diffrn_reflns_limit_l_min        -28
_diffrn_reflns_limit_l_max        25
_diffrn_reflns_theta_min          3.02
_diffrn_reflns_theta_max          29.00
_reflns_number_total              10327
_reflns_number_gt                 8446
_reflns_threshold_expression      >2sigma(I)
 
_computing_data_collection        'CrysAlis CCD (Oxford Diffraction, 2006)'
_computing_cell_refinement        'CrysAlis RED (Oxford Diffraction, 2006)'
_computing_data_reduction         'CrysAlis RED (Oxford Diffraction, 2006)'
_computing_structure_solution     'SHELXS-97 (Sheldrick, 1990)' 
_computing_structure_refinement   'SHELXL-97 (Sheldrick, 1997)'
_computing_molecular_graphics     ?
_computing_publication_material   ?
 
_refine_special_details
;
 Refinement of F^2^ against ALL reflections.  The weighted R-factor wR and
 goodness of fit S are based on F^2^, conventional R-factors R are based
 on F, with F set to zero for negative F^2^. The threshold expression of
 F^2^ > 2sigma(F^2^) is used only for calculating R-factors(gt) etc. and is
 not relevant to the choice of reflections for refinement.  R-factors based
 on F^2^ are statistically about twice as large as those based on F, and R-
 factors based on ALL data will be even larger.
;
 
_refine_ls_structure_factor_coef  Fsqd
_refine_ls_matrix_type            full
_refine_ls_weighting_scheme       calc
_refine_ls_weighting_details
 'calc w=1/[\s^2^(Fo^2^)+(0.0284P)^2^+0.0000P] where P=(Fo^2^+2Fc^2^)/3'
_atom_sites_solution_primary      direct
_atom_sites_solution_secondary    difmap
_atom_sites_solution_hydrogens    geom
_refine_ls_hydrogen_treatment     mixed
_refine_ls_extinction_method      none
_refine_ls_extinction_coef        ?
_refine_ls_number_reflns          10327
_refine_ls_number_parameters      661
_refine_ls_number_restraints      0
_refine_ls_R_factor_all           0.0275
_refine_ls_R_factor_gt            0.0194
_refine_ls_wR_factor_ref          0.0449
_refine_ls_wR_factor_gt           0.0438
_refine_ls_goodness_of_fit_ref    0.989
_refine_ls_restrained_S_all       0.989
_refine_ls_shift/su_max           0.004
_refine_ls_shift/su_mean          0.000
 
loop_
 _atom_site_label
 _atom_site_type_symbol
 _atom_site_fract_x
 _atom_site_fract_y
 _atom_site_fract_z
 _atom_site_U_iso_or_equiv
 _atom_site_adp_type
 _atom_site_occupancy
 _atom_site_symmetry_multiplicity
 _atom_site_calc_flag
 _atom_site_refinement_flags
 _atom_site_disorder_assembly
 _atom_site_disorder_group
C13 C 0.54094(11) 0.09464(19) 0.31175(9) 0.0160(4) Uani 1 1 d . . .
C18 C 0.46939(11) 0.0477(2) 0.30925(10) 0.0181(4) Uani 1 1 d . . .
C17 C 0.45904(12) -0.0798(2) 0.32485(12) 0.0247(5) Uani 1 1 d . . .
C16 C 0.52002(13) -0.1628(2) 0.34283(12) 0.0268(5) Uani 1 1 d . . .
C15 C 0.59053(12) -0.1193(2) 0.34361(11) 0.0230(4) Uani 1 1 d . . .
C14 C 0.60112(11) 0.0085(2) 0.32792(10) 0.0193(4) Uani 1 1 d . . .
C19 C 0.61625(10) 0.2441(2) 0.23926(9) 0.0176(4) Uani 1 1 d . . .
C24 C 0.61148(11) 0.1386(2) 0.19733(10) 0.0227(4) Uani 1 1 d . . .
C23 C 0.66247(12) 0.1218(2) 0.16084(11) 0.0285(5) Uani 1 1 d . . .
C22 C 0.71940(12) 0.2117(3) 0.16582(11) 0.0294(5) Uani 1 1 d . . .
C21 C 0.72414(11) 0.3176(2) 0.20620(11) 0.0256(5) Uani 1 1 d . . .
C20 C 0.67414(11) 0.3367(2) 0.24221(10) 0.0219(5) Uani 1 1 d . . .
C25 C 0.61386(10) 0.34469(19) 0.36074(9) 0.0157(4) Uani 1 1 d . . .
C30 C 0.67741(11) 0.2863(2) 0.40199(10) 0.0214(4) Uani 1 1 d . . .
C29 C 0.72648(11) 0.3569(2) 0.45123(10) 0.0243(5) Uani 1 1 d . . .
C28 C 0.71241(12) 0.4858(2) 0.45999(11) 0.0253(5) Uani 1 1 d . . .
C27 C 0.64932(12) 0.5442(2) 0.42038(11) 0.0252(5) Uani 1 1 d . . .
C26 C 0.60075(11) 0.4744(2) 0.37048(10) 0.0202(4) Uani 1 1 d . . .
C31 C 0.52926(10) 0.4988(2) 0.14395(9) 0.0175(4) Uani 1 1 d . . .
C36 C 0.54457(12) 0.6065(2) 0.18590(11) 0.0232(5) Uani 1 1 d . . .
C35 C 0.60519(13) 0.6856(2) 0.18755(12) 0.0294(5) Uani 1 1 d . . .
C34 C 0.65181(13) 0.6592(3) 0.14839(12) 0.0300(5) Uani 1 1 d . . .
C33 C 0.63761(12) 0.5529(2) 0.10711(11) 0.0259(5) Uani 1 1 d . . .
C32 C 0.57675(11) 0.4735(2) 0.10485(10) 0.0198(4) Uani 1 1 d . . .
C37 C 0.44256(10) 0.25848(19) 0.09888(9) 0.0158(4) Uani 1 1 d . . .
C42 C 0.42999(11) 0.1408(2) 0.12655(10) 0.0194(4) Uani 1 1 d . . .
C41 C 0.42044(11) 0.0275(2) 0.08943(11) 0.0235(5) Uani 1 1 d . . .
C40 C 0.42287(11) 0.0312(2) 0.02517(11) 0.0247(5) Uani 1 1 d . . .
C39 C 0.43406(12) 0.1473(2) -0.00323(11) 0.0246(5) Uani 1 1 d . . .
C38 C 0.44340(11) 0.2606(2) 0.03328(10) 0.0204(4) Uani 1 1 d . . .
C43 C 0.37124(10) 0.49537(19) 0.08805(9) 0.0153(4) Uani 1 1 d . . .
C44 C 0.38118(12) 0.6152(2) 0.06238(10) 0.0220(4) Uani 1 1 d . . .
C45 C 0.32061(14) 0.6779(2) 0.01965(12) 0.0300(5) Uani 1 1 d . . .
C46 C 0.25073(13) 0.6225(2) 0.00319(12) 0.0318(5) Uani 1 1 d . . .
C47 C 0.24001(12) 0.5024(2) 0.02785(11) 0.0288(5) Uani 1 1 d . . .
C48 C 0.29999(11) 0.4397(2) 0.07000(11) 0.0224(4) Uani 1 1 d . . .
C2 C 0.34229(10) 0.5010(2) 0.23098(10) 0.0177(4) Uani 1 1 d . . .
C10 C 0.34916(12) 0.6102(2) 0.28006(10) 0.0201(4) Uani 1 1 d . . .
C5 C 0.33667(11) 0.5465(2) 0.34152(10) 0.0196(4) Uani 1 1 d . . .
C8 C 0.30374(15) 0.6416(2) 0.38092(12) 0.0283(5) Uani 1 1 d . . .
C4 C 0.28575(11) 0.4231(2) 0.31362(10) 0.0186(4) Uani 1 1 d . . .
C7 C 0.21318(12) 0.4114(2) 0.33398(12) 0.0253(5) Uani 1 1 d . . .
C9 C 0.27165(11) 0.4348(2) 0.23911(10) 0.0193(4) Uani 1 1 d . . .
C3 C 0.33755(11) 0.3075(2) 0.33844(10) 0.0172(4) Uani 1 1 d . . .
C1 C 0.41729(11) 0.3614(2) 0.34724(10) 0.0180(4) Uani 1 1 d . . .
C6 C 0.41071(12) 0.4880(2) 0.38168(10) 0.0196(4) Uani 1 1 d . . .
C11 C 0.46622(14) 0.2242(3) 0.44639(12) 0.0390(6) Uani 1 1 d . . .
H11A H 0.4268 0.1596 0.4363 0.047 Uiso 1 1 calc R . .
H11B H 0.4523 0.2913 0.4728 0.047 Uiso 1 1 calc R . .
C12 C 0.53912(15) 0.1636(3) 0.48321(13) 0.0375(6) Uani 1 1 d . . .
O1 O 0.47587(7) 0.27807(14) 0.38742(7) 0.0196(3) Uani 1 1 d . . .
P1 P 0.55013(3) 0.26411(5) 0.28995(2) 0.01372(10) Uani 1 1 d . . .
P2 P 0.44646(3) 0.40604(5) 0.14705(2) 0.01353(10) Uani 1 1 d . . .
Pt1 Pt 0.437982(4) 0.380440(7) 0.253038(3) 0.01232(3) Uani 1 1 d . . .
H17A H 0.4106(14) -0.109(2) 0.3249(12) 0.026(6) Uiso 1 1 d . . .
H18A H 0.4248(13) 0.102(2) 0.2962(11) 0.021(6) Uiso 1 1 d . . .
H16A H 0.5128(13) -0.244(2) 0.3550(12) 0.030(6) Uiso 1 1 d . . .
H29A H 0.7693(11) 0.316(2) 0.4790(10) 0.015(5) Uiso 1 1 d . . .
H28A H 0.7431(13) 0.527(2) 0.4932(12) 0.031(7) Uiso 1 1 d . . .
H27A H 0.6362(12) 0.628(2) 0.4268(11) 0.018(6) Uiso 1 1 d . . .
H42A H 0.4273(11) 0.1388(18) 0.1713(11) 0.011(5) Uiso 1 1 d . . .
H39A H 0.4357(12) 0.149(2) -0.0450(11) 0.017(6) Uiso 1 1 d . . .
H38A H 0.4502(12) 0.339(2) 0.0133(11) 0.020(6) Uiso 1 1 d . . .
H36A H 0.5132(14) 0.624(2) 0.2121(12) 0.027(7) Uiso 1 1 d . . .
H32A H 0.5689(13) 0.405(2) 0.0811(12) 0.026(7) Uiso 1 1 d . . .
H22A H 0.7524(14) 0.194(2) 0.1434(12) 0.031(7) Uiso 1 1 d . . .
H10A H 0.3997(12) 0.658(2) 0.2901(10) 0.015(5) Uiso 1 1 d . . .
H3B H 0.3266(10) 0.2299(19) 0.3103(10) 0.010(5) Uiso 1 1 d . . .
H7A H 0.2225(13) 0.411(2) 0.3825(13) 0.028(6) Uiso 1 1 d . . .
H2A H 0.3343(13) 0.540(2) 0.1864(12) 0.031(7) Uiso 1 1 d . . .
H40A H 0.4193(14) -0.042(3) 0.0000(13) 0.040(7) Uiso 1 1 d . . .
H41A H 0.4118(13) -0.048(3) 0.1076(12) 0.033(7) Uiso 1 1 d . . .
H8B H 0.2573(14) 0.668(2) 0.3570(12) 0.030(7) Uiso 1 1 d . . .
H8A H 0.3004(14) 0.605(2) 0.4228(13) 0.033(7) Uiso 1 1 d . . .
H7C H 0.1756(13) 0.480(2) 0.3159(12) 0.034(7) Uiso 1 1 d . . .
H9A H 0.2288(13) 0.494(2) 0.2211(11) 0.025(6) Uiso 1 1 d . . .
H9B H 0.2622(12) 0.351(2) 0.2198(11) 0.019(6) Uiso 1 1 d . . .
H6B H 0.4492(13) 0.544(2) 0.3850(11) 0.024(6) Uiso 1 1 d . . .
H10B H 0.3075(12) 0.671(2) 0.2627(11) 0.021(6) Uiso 1 1 d . . .
H35A H 0.6150(15) 0.754(3) 0.2158(14) 0.049(8) Uiso 1 1 d . . .
H23A H 0.6560(12) 0.047(2) 0.1303(12) 0.029(6) Uiso 1 1 d . . .
H24A H 0.5712(15) 0.070(3) 0.1945(13) 0.042(7) Uiso 1 1 d . . .
H48A H 0.2934(13) 0.364(2) 0.0847(12) 0.027(7) Uiso 1 1 d . . .
H47A H 0.1919(13) 0.460(2) 0.0166(11) 0.026(6) Uiso 1 1 d . . .
H30A H 0.6864(14) 0.195(3) 0.3984(12) 0.037(7) Uiso 1 1 d . . .
H14A H 0.6477(12) 0.039(2) 0.3260(10) 0.021(6) Uiso 1 1 d . . .
H15A H 0.6311(13) -0.173(2) 0.3538(11) 0.025(6) Uiso 1 1 d . . .
H33A H 0.6686(12) 0.532(2) 0.0809(11) 0.025(6) Uiso 1 1 d . . .
H34A H 0.6922(14) 0.714(2) 0.1512(12) 0.036(7) Uiso 1 1 d . . .
H8C H 0.3372(13) 0.716(2) 0.3957(12) 0.031(7) Uiso 1 1 d . . .
H7B H 0.1845(14) 0.328(3) 0.3159(12) 0.038(7) Uiso 1 1 d . . .
H46A H 0.2126(15) 0.658(3) -0.0225(13) 0.041(8) Uiso 1 1 d . . .
H45A H 0.3300(14) 0.753(2) 0.0030(12) 0.041(8) Uiso 1 1 d . . .
H3A H 0.3305(12) 0.287(2) 0.3826(11) 0.020(6) Uiso 1 1 d . . .
H21A H 0.7678(13) 0.381(2) 0.2079(11) 0.026(6) Uiso 1 1 d . . .
H20A H 0.6781(16) 0.405(3) 0.2658(15) 0.048(9) Uiso 1 1 d . . .
H6A H 0.4076(11) 0.474(2) 0.4262(11) 0.020(6) Uiso 1 1 d . . .
H12B H 0.5555(16) 0.091(3) 0.4557(15) 0.060(10) Uiso 1 1 d . . .
H12A H 0.5339(17) 0.130(3) 0.5230(16) 0.053(9) Uiso 1 1 d . . .
H12C H 0.5789(17) 0.232(3) 0.4925(15) 0.063(9) Uiso 1 1 d . . .
H26A H 0.5614(12) 0.513(2) 0.3439(11) 0.019(6) Uiso 1 1 d . . .
H44A H 0.4259(13) 0.656(2) 0.0709(10) 0.019(6) Uiso 1 1 d . . .
 
loop_
 _atom_site_aniso_label
 _atom_site_aniso_U_11
 _atom_site_aniso_U_22
 _atom_site_aniso_U_33
 _atom_site_aniso_U_23
 _atom_site_aniso_U_13
 _atom_site_aniso_U_12
C13 0.0170(9) 0.0166(10) 0.0145(9) 0.0013(7) 0.0045(7) 0.0002(7)
C18 0.0167(9) 0.0180(10) 0.0190(10) 0.0002(8) 0.0041(8) 0.0014(8)
C17 0.0186(10) 0.0215(11) 0.0340(13) 0.0034(9) 0.0072(9) -0.0033(8)
C16 0.0295(11) 0.0148(10) 0.0339(13) 0.0053(9) 0.0050(10) -0.0003(9)
C15 0.0217(10) 0.0189(11) 0.0271(11) 0.0034(9) 0.0043(8) 0.0068(9)
C14 0.0163(9) 0.0196(11) 0.0215(10) 0.0010(8) 0.0043(8) 0.0007(8)
C19 0.0126(8) 0.0234(11) 0.0162(9) 0.0043(8) 0.0031(7) 0.0039(7)
C24 0.0175(9) 0.0302(12) 0.0197(10) 0.0002(9) 0.0038(8) 0.0027(9)
C23 0.0240(10) 0.0407(14) 0.0215(11) -0.0019(10) 0.0077(9) 0.0068(10)
C22 0.0193(10) 0.0470(15) 0.0253(12) 0.0052(11) 0.0115(9) 0.0075(10)
C21 0.0161(9) 0.0367(13) 0.0249(11) 0.0103(10) 0.0071(8) 0.0018(9)
C20 0.0160(9) 0.0334(12) 0.0135(9) 0.0020(9) -0.0007(8) 0.0133(9)
C25 0.0137(8) 0.0201(10) 0.0141(9) 0.0012(7) 0.0051(7) -0.0034(7)
C30 0.0178(9) 0.0253(12) 0.0207(10) 0.0016(9) 0.0048(8) 0.0020(8)
C29 0.0175(9) 0.0334(13) 0.0193(10) 0.0049(9) 0.0008(8) -0.0018(9)
C28 0.0248(10) 0.0307(13) 0.0177(10) -0.0011(9) 0.0012(9) -0.0132(9)
C27 0.0300(11) 0.0190(11) 0.0252(11) -0.0008(9) 0.0055(9) -0.0069(9)
C26 0.0170(9) 0.0208(11) 0.0212(10) 0.0033(8) 0.0024(8) -0.0024(8)
C31 0.0134(8) 0.0210(10) 0.0165(9) 0.0058(8) 0.0013(7) -0.0017(7)
C36 0.0207(10) 0.0285(12) 0.0210(10) -0.0017(9) 0.0070(8) -0.0056(9)
C35 0.0283(11) 0.0318(13) 0.0270(12) -0.0049(10) 0.0058(10) -0.0133(10)
C34 0.0219(10) 0.0387(14) 0.0280(12) 0.0045(10) 0.0045(9) -0.0129(10)
C33 0.0196(10) 0.0364(14) 0.0234(11) 0.0068(10) 0.0088(9) -0.0010(9)
C32 0.0176(9) 0.0239(11) 0.0177(10) 0.0028(9) 0.0047(8) 0.0001(8)
C37 0.0105(8) 0.0191(10) 0.0167(9) -0.0030(8) 0.0019(7) 0.0016(7)
C42 0.0159(9) 0.0221(11) 0.0209(10) -0.0024(8) 0.0063(8) -0.0002(8)
C41 0.0190(10) 0.0197(11) 0.0332(12) -0.0039(9) 0.0095(9) -0.0021(8)
C40 0.0170(9) 0.0259(12) 0.0318(12) -0.0130(10) 0.0076(9) -0.0016(8)
C39 0.0230(10) 0.0322(13) 0.0187(10) -0.0060(9) 0.0057(8) 0.0032(9)
C38 0.0177(9) 0.0236(11) 0.0200(10) 0.0007(9) 0.0053(8) 0.0032(8)
C43 0.0154(8) 0.0180(10) 0.0123(9) -0.0006(7) 0.0035(7) 0.0015(7)
C44 0.0217(10) 0.0197(11) 0.0231(10) -0.0002(9) 0.0034(8) -0.0013(9)
C45 0.0363(13) 0.0205(12) 0.0294(13) 0.0065(10) 0.0025(10) 0.0044(10)
C46 0.0282(11) 0.0312(13) 0.0276(12) 0.0030(10) -0.0066(9) 0.0121(10)
C47 0.0173(10) 0.0355(14) 0.0293(12) -0.0006(10) -0.0009(9) 0.0014(9)
C48 0.0196(10) 0.0222(12) 0.0243(11) 0.0033(9) 0.0043(8) -0.0012(8)
C2 0.0168(9) 0.0184(10) 0.0191(10) 0.0001(8) 0.0069(8) 0.0023(7)
C10 0.0238(10) 0.0170(10) 0.0210(10) 0.0004(8) 0.0089(8) 0.0037(8)
C5 0.0251(10) 0.0162(10) 0.0194(10) -0.0035(8) 0.0090(8) 0.0010(8)
C8 0.0413(14) 0.0229(12) 0.0248(12) -0.0023(10) 0.0161(10) 0.0052(11)
C4 0.0164(9) 0.0189(10) 0.0223(10) -0.0017(8) 0.0083(8) 0.0012(8)
C7 0.0206(10) 0.0308(13) 0.0273(12) -0.0003(10) 0.0115(9) 0.0030(9)
C9 0.0148(9) 0.0220(11) 0.0207(10) -0.0023(9) 0.0044(8) 0.0021(8)
C3 0.0167(9) 0.0166(10) 0.0202(10) 0.0011(8) 0.0081(8) -0.0001(7)
C1 0.0156(8) 0.0228(11) 0.0169(9) 0.0045(8) 0.0064(7) 0.0019(8)
C6 0.0226(10) 0.0192(11) 0.0176(10) -0.0013(8) 0.0067(8) -0.0019(8)
C11 0.0379(13) 0.0560(18) 0.0273(13) 0.0166(12) 0.0162(11) 0.0165(12)
C12 0.0332(13) 0.0542(18) 0.0238(13) 0.0166(12) 0.0056(10) 0.0052(12)
O1 0.0174(6) 0.0238(8) 0.0184(7) 0.0044(6) 0.0061(5) 0.0031(6)
P1 0.0114(2) 0.0150(2) 0.0145(2) 0.00164(19) 0.00315(18) 0.00040(18)
P2 0.0113(2) 0.0161(3) 0.0130(2) 0.00096(18) 0.00290(17) -0.00015(17)
Pt1 0.01116(3) 0.01271(4) 0.01264(4) 0.00104(3) 0.00249(2) -0.00048(3)
 
_geom_special_details
;
 All esds (except the esd in the dihedral angle between two l.s. planes)
 are estimated using the full covariance matrix.  The cell esds are taken
 into account individually in the estimation of esds in distances, angles
 and torsion angles; correlations between esds in cell parameters are only
 used when they are defined by crystal symmetry.  An approximate (isotropic)
 treatment of cell esds is used for estimating esds involving l.s. planes.
;
 
loop_
 _geom_bond_atom_site_label_1
 _geom_bond_atom_site_label_2
 _geom_bond_distance
 _geom_bond_site_symmetry_2
 _geom_bond_publ_flag
C13 C14 1.395(3) . ?
C13 C18 1.399(3) . ?
C13 P1 1.833(2) . ?
C18 C17 1.386(3) . ?
C17 C16 1.387(3) . ?
C16 C15 1.377(3) . ?
C15 C14 1.390(3) . ?
C19 C24 1.395(3) . ?
C19 C20 1.427(3) . ?
C19 P1 1.849(2) . ?
C24 C23 1.386(3) . ?
C23 C22 1.388(3) . ?
C22 C21 1.377(3) . ?
C21 C20 1.366(3) . ?
C25 C26 1.389(3) . ?
C25 C30 1.396(3) . ?
C25 P1 1.8350(19) . ?
C30 C29 1.389(3) . ?
C29 C28 1.381(3) . ?
C28 C27 1.377(3) . ?
C27 C26 1.388(3) . ?
C31 C32 1.389(3) . ?
C31 C36 1.404(3) . ?
C31 P2 1.8260(19) . ?
C36 C35 1.382(3) . ?
C35 C34 1.379(3) . ?
C34 C33 1.384(3) . ?
C33 C32 1.385(3) . ?
C37 C38 1.395(3) . ?
C37 C42 1.399(3) . ?
C37 P2 1.827(2) . ?
C42 C41 1.395(3) . ?
C41 C40 1.375(3) . ?
C40 C39 1.385(3) . ?
C39 C38 1.388(3) . ?
C43 C44 1.386(3) . ?
C43 C48 1.394(3) . ?
C43 P2 1.8446(18) . ?
C44 C45 1.393(3) . ?
C45 C46 1.371(3) . ?
C46 C47 1.383(3) . ?
C47 C48 1.382(3) . ?
C2 C10 1.517(3) . ?
C2 C9 1.528(3) . ?
C2 Pt1 2.1126(19) . ?
C10 C5 1.532(3) . ?
C5 C8 1.522(3) . ?
C5 C6 1.527(3) . ?
C5 C4 1.601(3) . ?
C4 C7 1.525(3) . ?
C4 C9 1.533(3) . ?
C4 C3 1.533(3) . ?
C3 C1 1.541(3) . ?
C1 O1 1.462(2) . ?
C1 C6 1.520(3) . ?
C1 Pt1 2.143(2) . ?
C11 O1 1.424(3) . ?
C11 C12 1.499(3) . ?
P1 Pt1 2.3419(5) . ?
P2 Pt1 2.3092(5) . ?
 
loop_
 _geom_angle_atom_site_label_1
 _geom_angle_atom_site_label_2
 _geom_angle_atom_site_label_3
 _geom_angle
 _geom_angle_site_symmetry_1
 _geom_angle_site_symmetry_3
 _geom_angle_publ_flag
C14 C13 C18 118.22(18) . . ?
C14 C13 P1 123.35(15) . . ?
C18 C13 P1 118.37(15) . . ?
C17 C18 C13 120.87(19) . . ?
C18 C17 C16 119.9(2) . . ?
C15 C16 C17 120.0(2) . . ?
C16 C15 C14 120.2(2) . . ?
C15 C14 C13 120.71(19) . . ?
C24 C19 C20 117.94(19) . . ?
C24 C19 P1 121.44(16) . . ?
C20 C19 P1 120.62(16) . . ?
C23 C24 C19 121.3(2) . . ?
C24 C23 C22 119.6(2) . . ?
C21 C22 C23 119.8(2) . . ?
C20 C21 C22 121.6(2) . . ?
C21 C20 C19 119.7(2) . . ?
C26 C25 C30 118.46(18) . . ?
C26 C25 P1 117.43(14) . . ?
C30 C25 P1 123.93(16) . . ?
C29 C30 C25 120.6(2) . . ?
C28 C29 C30 120.0(2) . . ?
C27 C28 C29 120.08(19) . . ?
C28 C27 C26 120.1(2) . . ?
C27 C26 C25 120.81(19) . . ?
C32 C31 C36 118.42(19) . . ?
C32 C31 P2 126.75(16) . . ?
C36 C31 P2 114.83(15) . . ?
C35 C36 C31 120.5(2) . . ?
C34 C35 C36 120.4(2) . . ?
C35 C34 C33 119.7(2) . . ?
C34 C33 C32 120.3(2) . . ?
C33 C32 C31 120.7(2) . . ?
C38 C37 C42 118.70(19) . . ?
C38 C37 P2 122.30(16) . . ?
C42 C37 P2 118.61(15) . . ?
C41 C42 C37 120.3(2) . . ?
C40 C41 C42 120.1(2) . . ?
C41 C40 C39 120.2(2) . . ?
C40 C39 C38 120.1(2) . . ?
C39 C38 C37 120.5(2) . . ?
C44 C43 C48 118.67(18) . . ?
C44 C43 P2 123.84(14) . . ?
C48 C43 P2 117.46(15) . . ?
C43 C44 C45 120.1(2) . . ?
C46 C45 C44 120.4(2) . . ?
C45 C46 C47 120.2(2) . . ?
C48 C47 C46 119.5(2) . . ?
C47 C48 C43 121.1(2) . . ?
C10 C2 C9 99.77(16) . . ?
C10 C2 Pt1 112.37(13) . . ?
C9 C2 Pt1 113.78(14) . . ?
C2 C10 C5 105.00(16) . . ?
C8 C5 C6 112.62(18) . . ?
C8 C5 C10 111.42(18) . . ?
C6 C5 C10 108.78(17) . . ?
C8 C5 C4 115.70(18) . . ?
C6 C5 C4 103.74(16) . . ?
C10 C5 C4 103.90(16) . . ?
C7 C4 C9 112.54(17) . . ?
C7 C4 C3 111.03(18) . . ?
C9 C4 C3 109.20(17) . . ?
C7 C4 C5 115.73(17) . . ?
C9 C4 C5 103.51(16) . . ?
C3 C4 C5 104.20(15) . . ?
C2 C9 C4 104.04(16) . . ?
C4 C3 C1 104.41(16) . . ?
O1 C1 C6 111.88(16) . . ?
O1 C1 C3 113.03(16) . . ?
C6 C1 C3 99.73(16) . . ?
O1 C1 Pt1 107.62(12) . . ?
C6 C1 Pt1 115.23(14) . . ?
C3 C1 Pt1 109.34(13) . . ?
C1 C6 C5 104.61(16) . . ?
O1 C11 C12 108.0(2) . . ?
C11 O1 C1 119.33(16) . . ?
C13 P1 C25 108.17(9) . . ?
C13 P1 C19 99.29(9) . . ?
C25 P1 C19 98.37(9) . . ?
C13 P1 Pt1 116.13(6) . . ?
C25 P1 Pt1 110.64(7) . . ?
C19 P1 Pt1 122.15(6) . . ?
C31 P2 C37 108.90(9) . . ?
C31 P2 C43 101.43(9) . . ?
C37 P2 C43 97.65(8) . . ?
C31 P2 Pt1 112.17(6) . . ?
C37 P2 Pt1 116.41(7) . . ?
C43 P2 Pt1 118.44(6) . . ?
C2 Pt1 C1 84.64(8) . . ?
C2 Pt1 P2 89.66(6) . . ?
C1 Pt1 P2 173.72(5) . . ?
C2 Pt1 P1 172.32(6) . . ?
C1 Pt1 P1 90.62(5) . . ?
P2 Pt1 P1 95.325(17) . . ?
 
_diffrn_measured_fraction_theta_max    0.995
_diffrn_reflns_theta_full              29.00
_diffrn_measured_fraction_theta_full   0.995
_refine_diff_density_max    1.523
_refine_diff_density_min   -0.918
_refine_diff_density_rms    0.085
